# Supplementary material for: Effects of doping high-valence transition metal (V, Nb and Zr) ions on the structure and electrochemical performance of LIB cathode material LiNi0.8Co0.1Mn0.1O2
Source: Royal Society of Chemistry journal article supplement (doi:10.1039/d1cp00426c), 2021-01-01
Supplement: d1cp00426c1.pdf [file d1cp00426c1.pdf]

## Supporting Information

For

### Effects of doping high-valence transition metal (V, Nb and Zr) ions on the structure and electrochemical performance of LIB cathode material $\text{LiNi}_{0.8}\text{Co}_{0.1}\text{Mn}_{0.1}\text{O}_2$

Yan-Hui Chen,<sup>a</sup> Jing Zhang,<sup>a</sup> Yi Li,<sup>a</sup> Yong-fan Zhang,<sup>a</sup> Shu-Ping Huang,<sup>a\*</sup> Wei Lin,<sup>a\*</sup> Wen-Kai Chen,<sup>a,b,c\*</sup>

<sup>a</sup> College of Chemistry, Fuzhou University, Fuzhou, Fujian 350116, P. R. China

<sup>b</sup> State Key Laboratory of Photocatalysis on Energy and Environment, Fuzhou, Fujian 350116, China

<sup>c</sup> Fujian Provincial Key Laboratory of Theoretical and Computational Chemistry (FTCC), Xiamen University, Xiamen, Fujian 61005, China

\*Corresponding author: Shuping Huang, Wei Lin and Wen-kai Chen

E-mail address: huangshp@gmail.com

wlin@fzu.edu.cn

wkchen@fzu.edu.cn

**Table S1** The  $U$  values of TMs in NCM811

| Metal                       | Ni  | Co  | Mn  | V   | Nb  | Zr  |
|-----------------------------|-----|-----|-----|-----|-----|-----|
| $U$ value (eV) <sup>a</sup> | 6.5 | 6.0 | 5.0 | 3.0 | 3.0 | 5.0 |

<sup>a</sup>  $U$  values adopted from ref. <sup>1,2</sup>.

**Table S2** The lattice parameters for NCMs based on DFT+D3 calculation and experiment, and the average calculated bond lengths of Li-O

| Method                  | NCM      | $a$ (Å) | $c$ (Å) | $V$ (Å <sup>3</sup> ) | Li-O (Å) |
|-------------------------|----------|---------|---------|-----------------------|----------|
| Experiment <sup>a</sup> | Pristine | 2.873   | 14.205  | 101.552               | /        |
| Calculation             | Pristine | 2.874   | 14.048  | 100.434               | 2.101    |
|                         | V doped  | 2.873   | 14.059  | 100.486               | 2.100    |
|                         | Nb doped | 2.874   | 14.079  | 100.715               | 2.101    |
|                         | Zr doped | 2.874   | 14.090  | 100.920               | 2.102    |

<sup>a</sup> The experimental lattice parameter adopted from ref. <sup>3</sup>

**Table S3** The ionic radii of transition metal ions of NCMs from ref. <sup>4</sup>

| Metal ion        | Radius (Å) | Metal ion        | Radius (Å) |
|------------------|------------|------------------|------------|
| Ni <sup>2+</sup> | 0.69       | Mn <sup>4+</sup> | 0.53       |
| Ni <sup>3+</sup> | 0.56       | V <sup>5+</sup>  | 0.54       |
| Ni <sup>4+</sup> | 0.48       | Nb <sup>5+</sup> | 0.74       |
| Co <sup>3+</sup> | 0.55       | Zr <sup>4+</sup> | 0.84       |

**Table S4** The oxidation states and electronic configurations of TMs in NCMs

| Metal atom | Oxidation state | Electronic configuration                                                                                           |
|------------|-----------------|--------------------------------------------------------------------------------------------------------------------|
| Ni         | +2              | $t_{2g}^6 (\downarrow\uparrow\downarrow\downarrow\uparrow\downarrow\uparrow) e_g^2 (\uparrow\uparrow\downarrow)$   |
|            | +3              | $t_{2g}^6 (\downarrow\uparrow\downarrow\downarrow\uparrow\downarrow\uparrow) e_g^1 (\uparrow\downarrow\downarrow)$ |
|            | +4              | $t_{2g}^6 (\downarrow\uparrow\downarrow\downarrow\uparrow\downarrow\uparrow) e_g^0 (\downarrow\downarrow)$         |
| Co         | +3              | $t_{2g}^6 (\downarrow\uparrow\downarrow\downarrow\uparrow\downarrow\uparrow) e_g^0 (\downarrow\downarrow)$         |

|    |    |                                                                                    |
|----|----|------------------------------------------------------------------------------------|
|    | +4 | $t_{2g}^5(\downarrow\uparrow\downarrow\uparrow\downarrow) e_g^0(\uparrow\uparrow)$ |
| Mn | +4 | $t_{2g}^3(\uparrow\uparrow\uparrow) e_g^0(\uparrow\uparrow)$                       |
| V  | +5 | $t_{2g}^0(\uparrow\uparrow\uparrow) e_g^0(\uparrow\uparrow)$                       |
| Nb | +5 | $t_{2g}^0(\uparrow\uparrow\uparrow) e_g^0(\uparrow\uparrow)$                       |
| Zr | +4 | $t_{2g}^0(\uparrow\uparrow\uparrow) e_g^0(\uparrow\uparrow)$                       |

**Table S5** The magnetic moments range and amounts of different Ni ions of the pristine and V-, Nb- and Zr-doped NCMs

| NCM      | Li content | Ni <sup>2+</sup> ( $\mu$ B) | Amount | Ni <sup>3+</sup> ( $\mu$ B) | Amount | Ni <sup>4+</sup> ( $\mu$ B) | Amount |
|----------|------------|-----------------------------|--------|-----------------------------|--------|-----------------------------|--------|
| pristine | 1          | 1.63-1.55                   | 6      | 1.16-0.94                   | 42     | /                           | 0      |
|          | 0.8        | 1.35                        | 1      | 0.75-0.52                   | 39     | 0.27-0.00                   | 8      |
|          | 0.6        | /                           | 0      | 0.69-0.33                   | 30     | 0.22-0.01                   | 18     |
|          | 0.4        | /                           | 0      | 0.66-0.33                   | 13     | 0.28-0.01                   | 35     |
|          | 0.2        | /                           | 0      | 0.36-0.31                   | 2      | 0.22-0.00                   | 46     |
|          | 0          | /                           | 0      | /                           | 0      | 0.08-0.00                   | 48     |
| V doped  | 1          | 1.38-1.26                   | 8      | 0.92-0.60                   | 39     | /                           | 0      |
|          | 0.8        | 1.32-1.21                   | 3      | 0.98-0.45                   | 37     | 0.25-0.03                   | 7      |
|          | 0.6        | 1.25                        | 1      | 0.95-0.34                   | 25     | 0.27-0.01                   | 21     |
|          | 0.4        | /                           | 0      | 0.72-0.30                   | 15     | 0.28-0.00                   | 32     |
|          | 0.2        | /                           | 0      | 0.39                        | 1      | 0.27-0.00                   | 46     |
|          | 0          | /                           | 0      | /                           | 0      | 0.10-0.00                   | 47     |
| Nb doped | 1          | 1.43-1.19                   | 9      | 0.82-0.45                   | 38     | /                           | 0      |
|          | 0.8        | 1.31-1.26                   | 3      | 0.77-0.33                   | 37     | 0.20-0.04                   | 7      |
|          | 0.6        | 1.34                        | 1      | 0.80-0.36                   | 29     | 0.29-0.03                   | 17     |
|          | 0.4        | /                           | 0      | 0.70-0.35                   | 18     | 0.22-0.00                   | 29     |
|          | 0.2        | /                           | 0      | 0.61-0.37                   | 4      | 0.15-0.00                   | 43     |
|          | 0          | /                           | 0      | /                           | 0      | 0.06-0.00                   | 47     |
| Zr doped | 1          | 1.44-1.20                   | 7      | 0.92-0.59                   | 40     | /                           | 0      |
|          | 0.8        | 1.27-1.25                   | 2      | 0.87-0.33                   | 38     | 0.15-0.01                   | 7      |
|          | 0.6        | 1.14                        | 1      | 0.88-0.32                   | 27     | 0.24-0.00                   | 19     |
|          | 0.4        | /                           | 0      | 0.70-0.38                   | 15     | 0.28-0.00                   | 32     |
|          | 0.2        | /                           | 0      | 0.56-0.35                   | 2      | 0.25-0.00                   | 45     |
|          | 0          | /                           | 0      | /                           | 0      | 0.05-0.00                   | 47     |

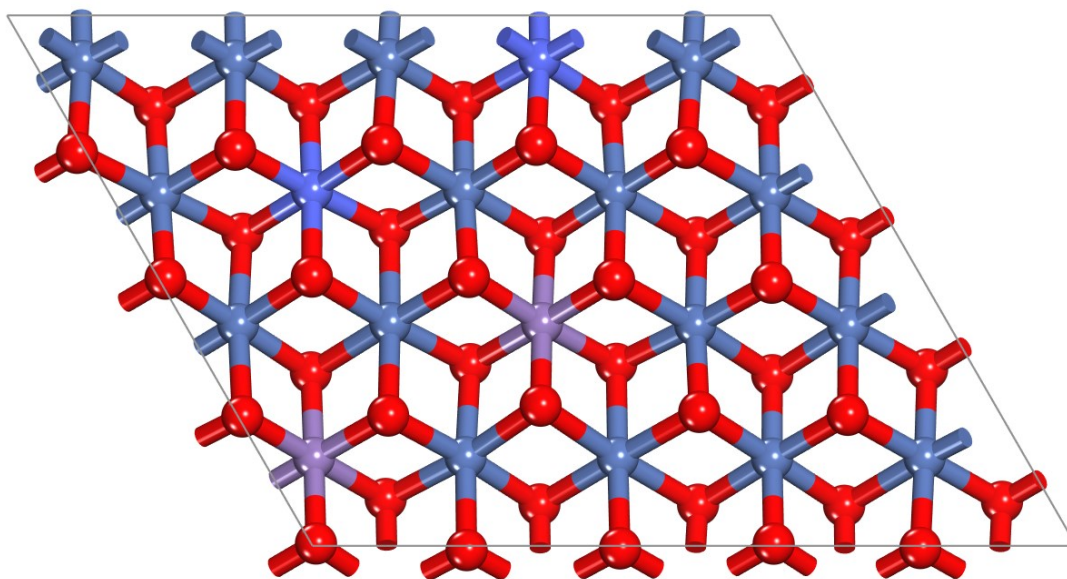

**Fig. S1** The TM ordering of the model 1 from Ref. <sup>5</sup>.

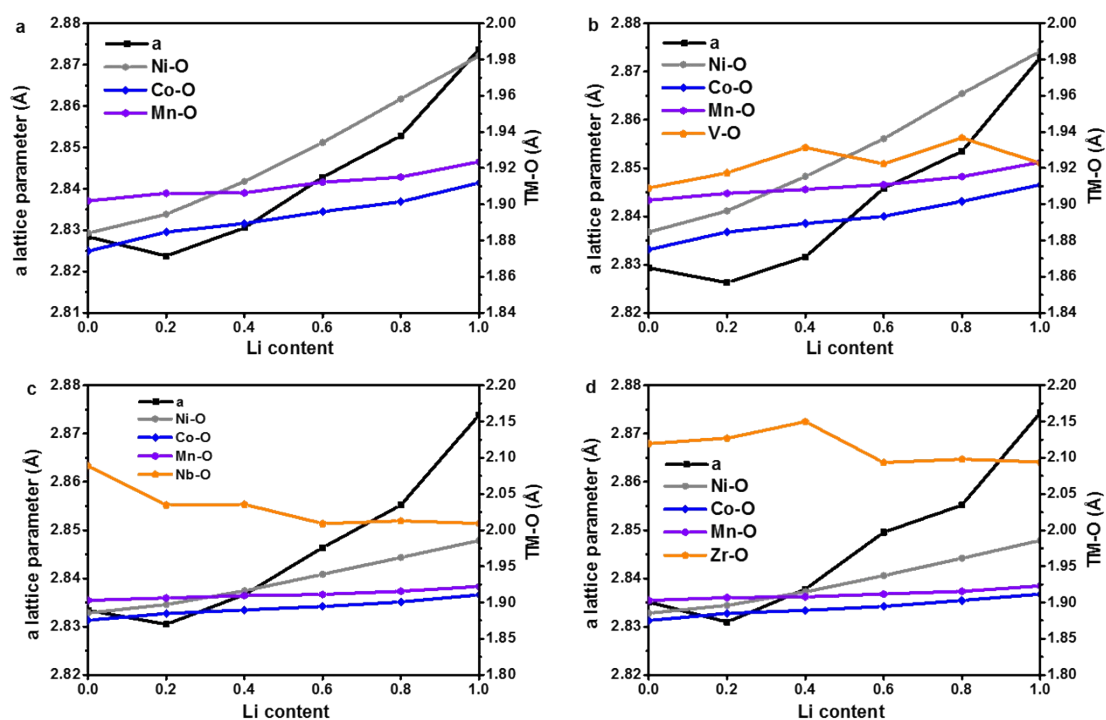

**Fig. S2** (a-d) The *a* lattice parameters and TM-O bond lengths of the pristine and V-, Nb- and Zr-doped NCMs, respectively.

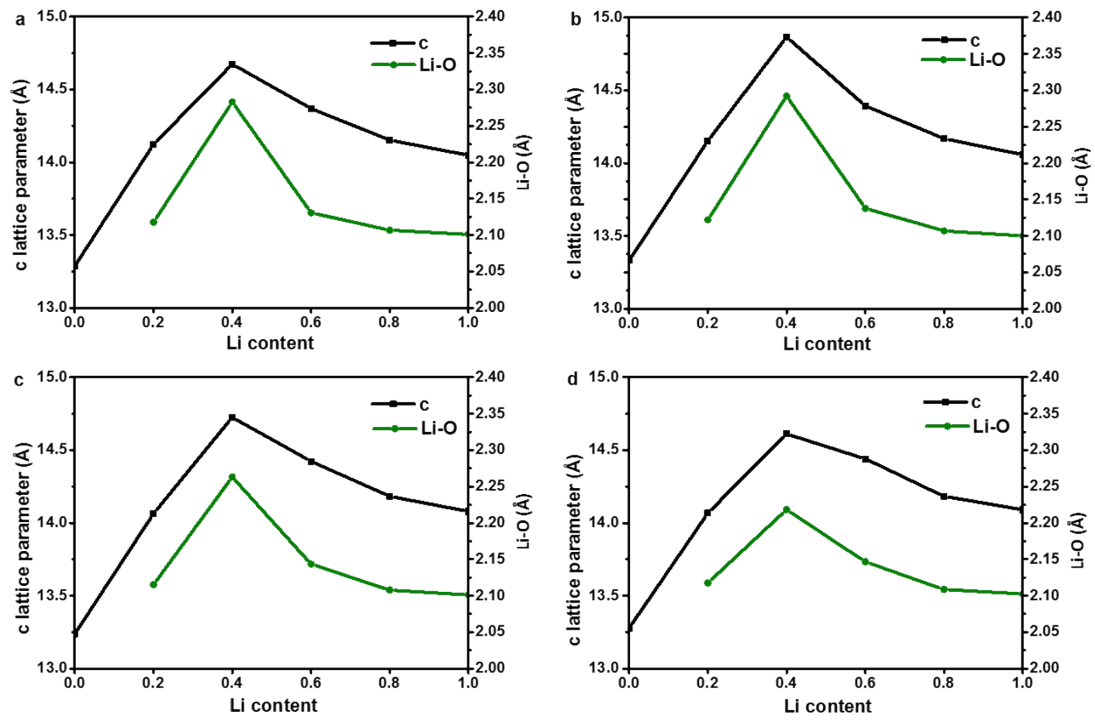

**Fig. S3** (a-d) The *c* lattice parameters and Li-O bond lengths of the pristine and V-, Nb- and Zr-doped NCMs, respectively.

## References

1. C. Liang, F. Kong, R. C. Longo, C. Zhang, Y. Nie, Y. Zheng and K. Cho, *J. Mater. Chem. A*, 2017, **5**, 25303-25313.
2. R. C. Longo, F. Kong, C. Liang, D.-H. Yeon, J. Yoon, J.-H. Park, S.-G. Doo and K. Cho, *J. Phys. Chem. C*, 2016, **120**, 8540-8549.
3. T. Weigel, F. Schipper, E. M. Erickson, F. A. Susai, B. Markovsky and D. Aurbach, *ACS Energy Lett.*, 2019, **4**, 508-516.
4. R. D. Shannon, *Acta Cryst.*, 1976, **A32**, 751-767.
5. M. Dixit, B. Markovsky, F. Schipper, D. Aurbach and D. T. Major, *J. Phys. Chem. C*, 2017, **121**, 22628-22636.
